# Supplementary material
Source: publisher site journal article supplement (https://www.dovepress.com/article/385470)
Supplement: Supplementary file 1 [file get_supplementary_file.php]

# **Supplementary material**


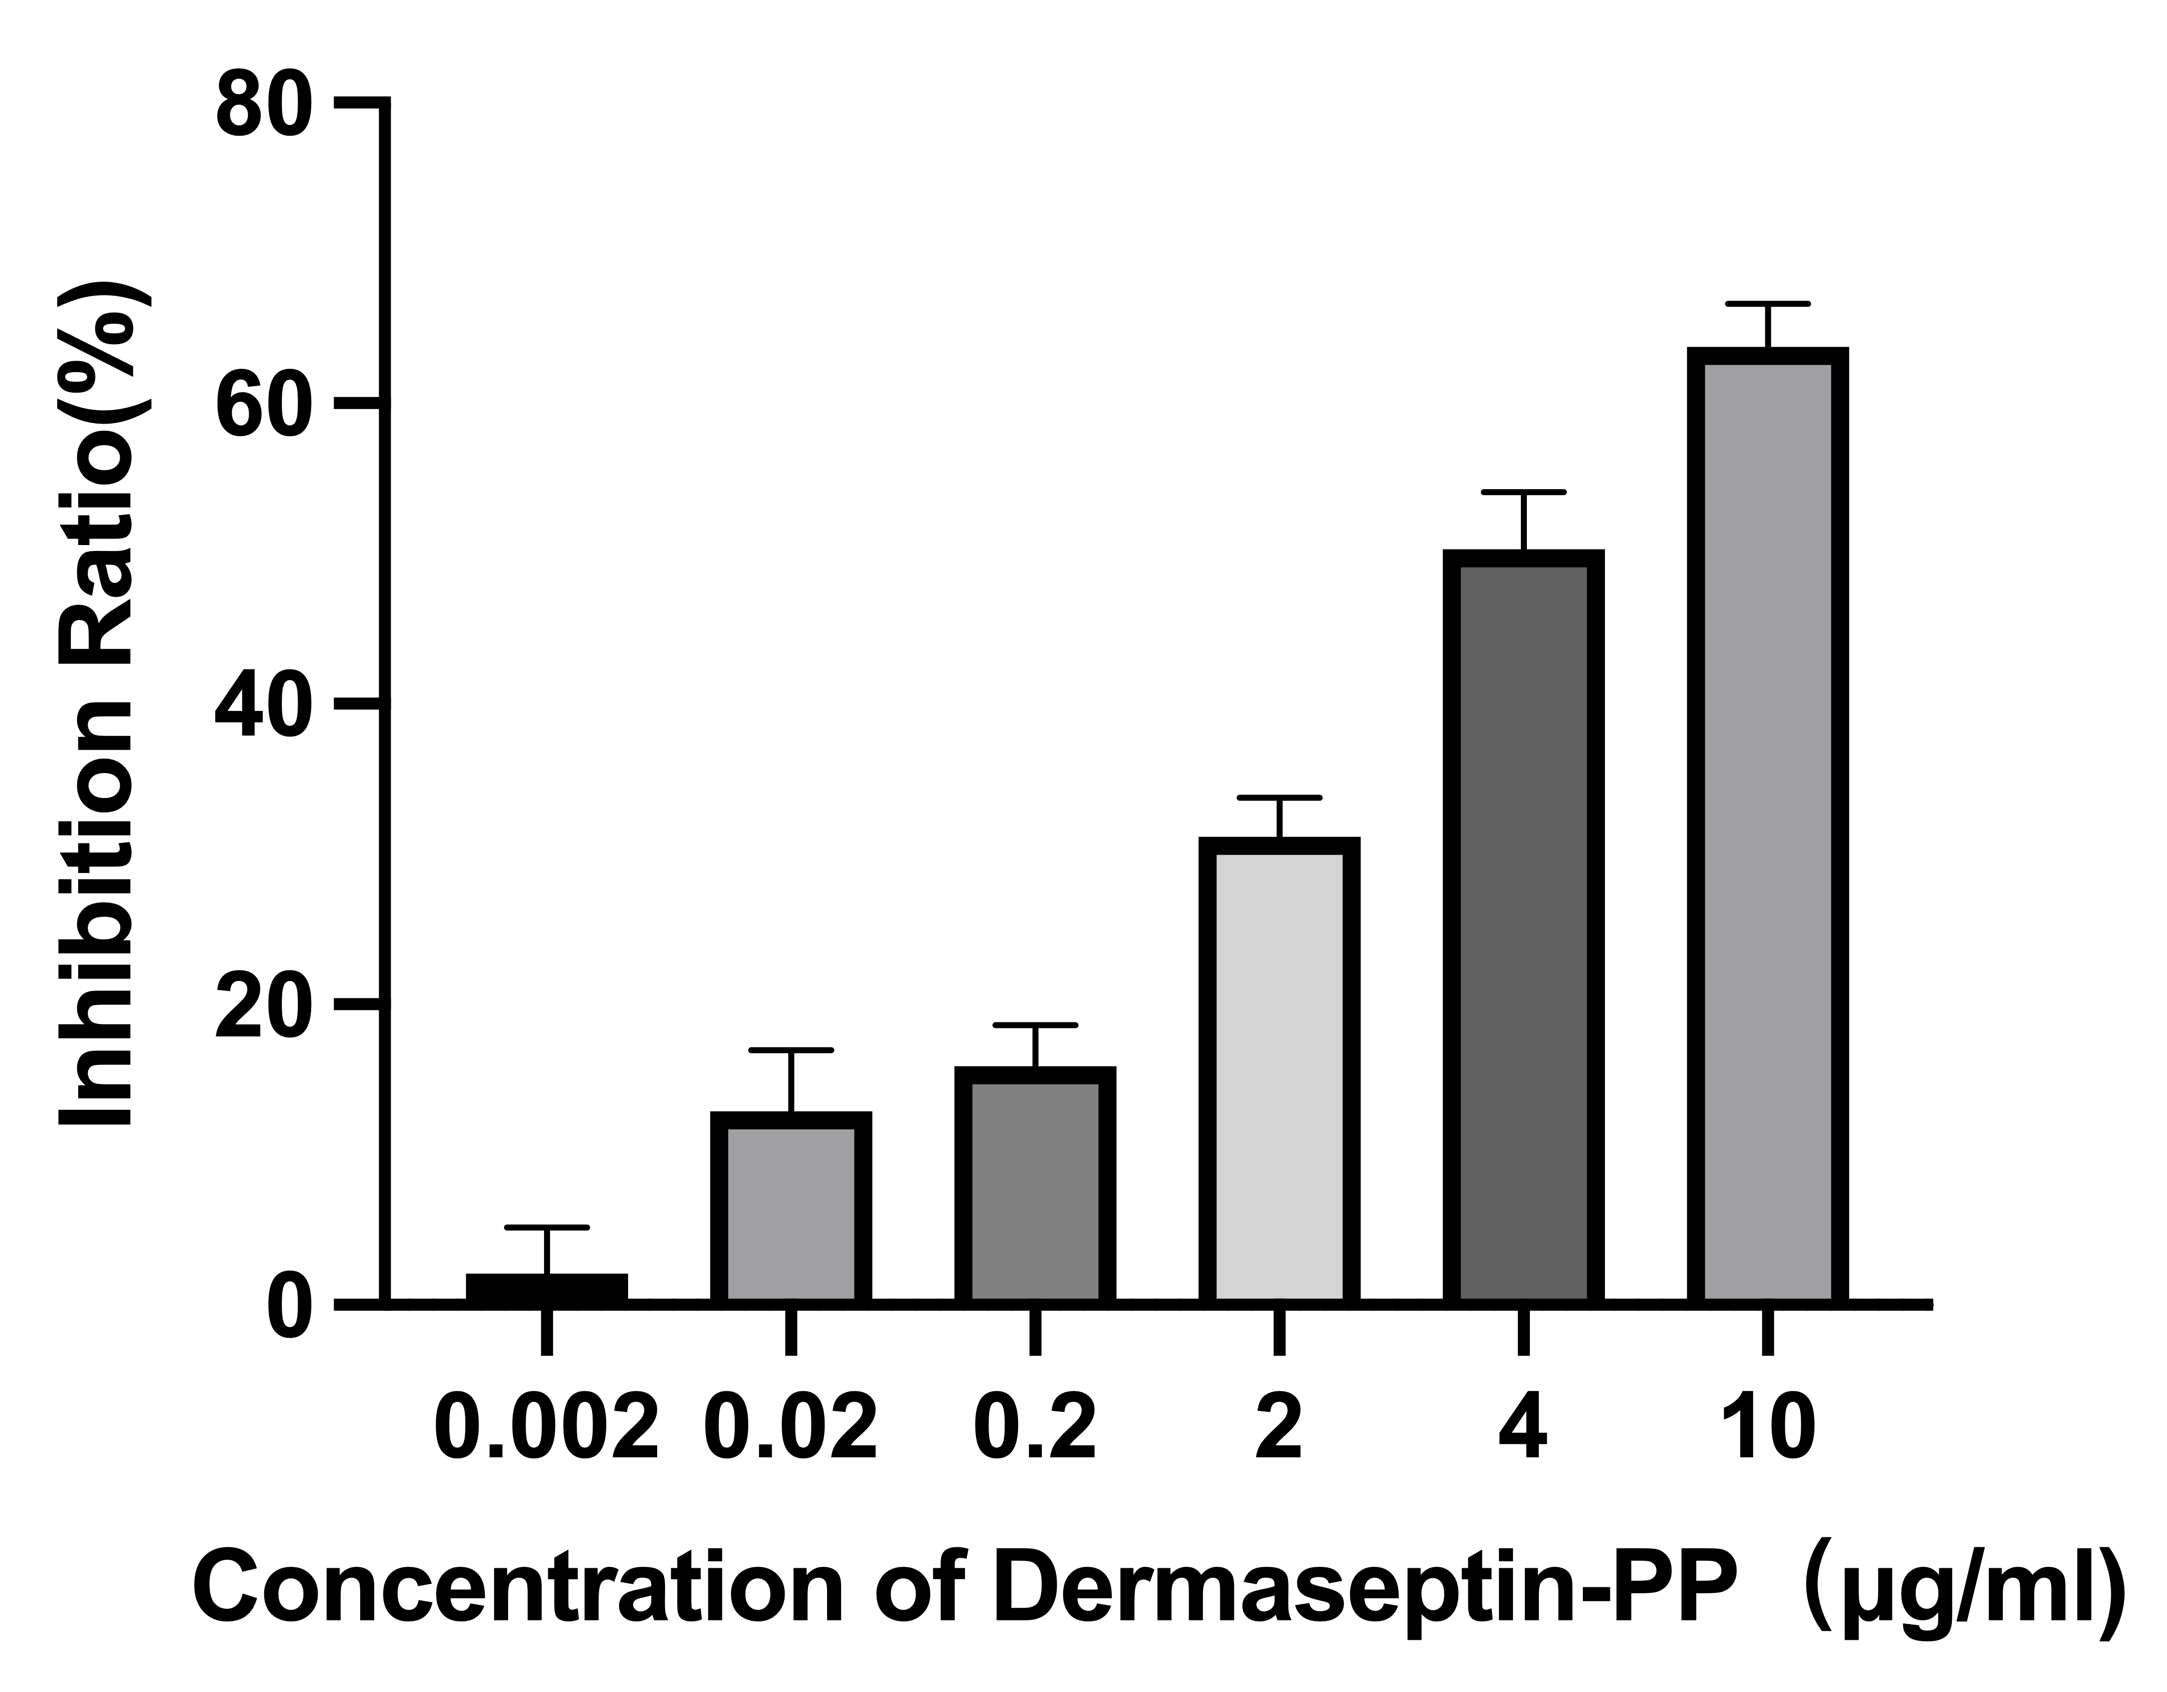


**Figure S1** *In vitro* cytotoxicity assessment of Dermaseptin-PP with different concentrations (n=6).


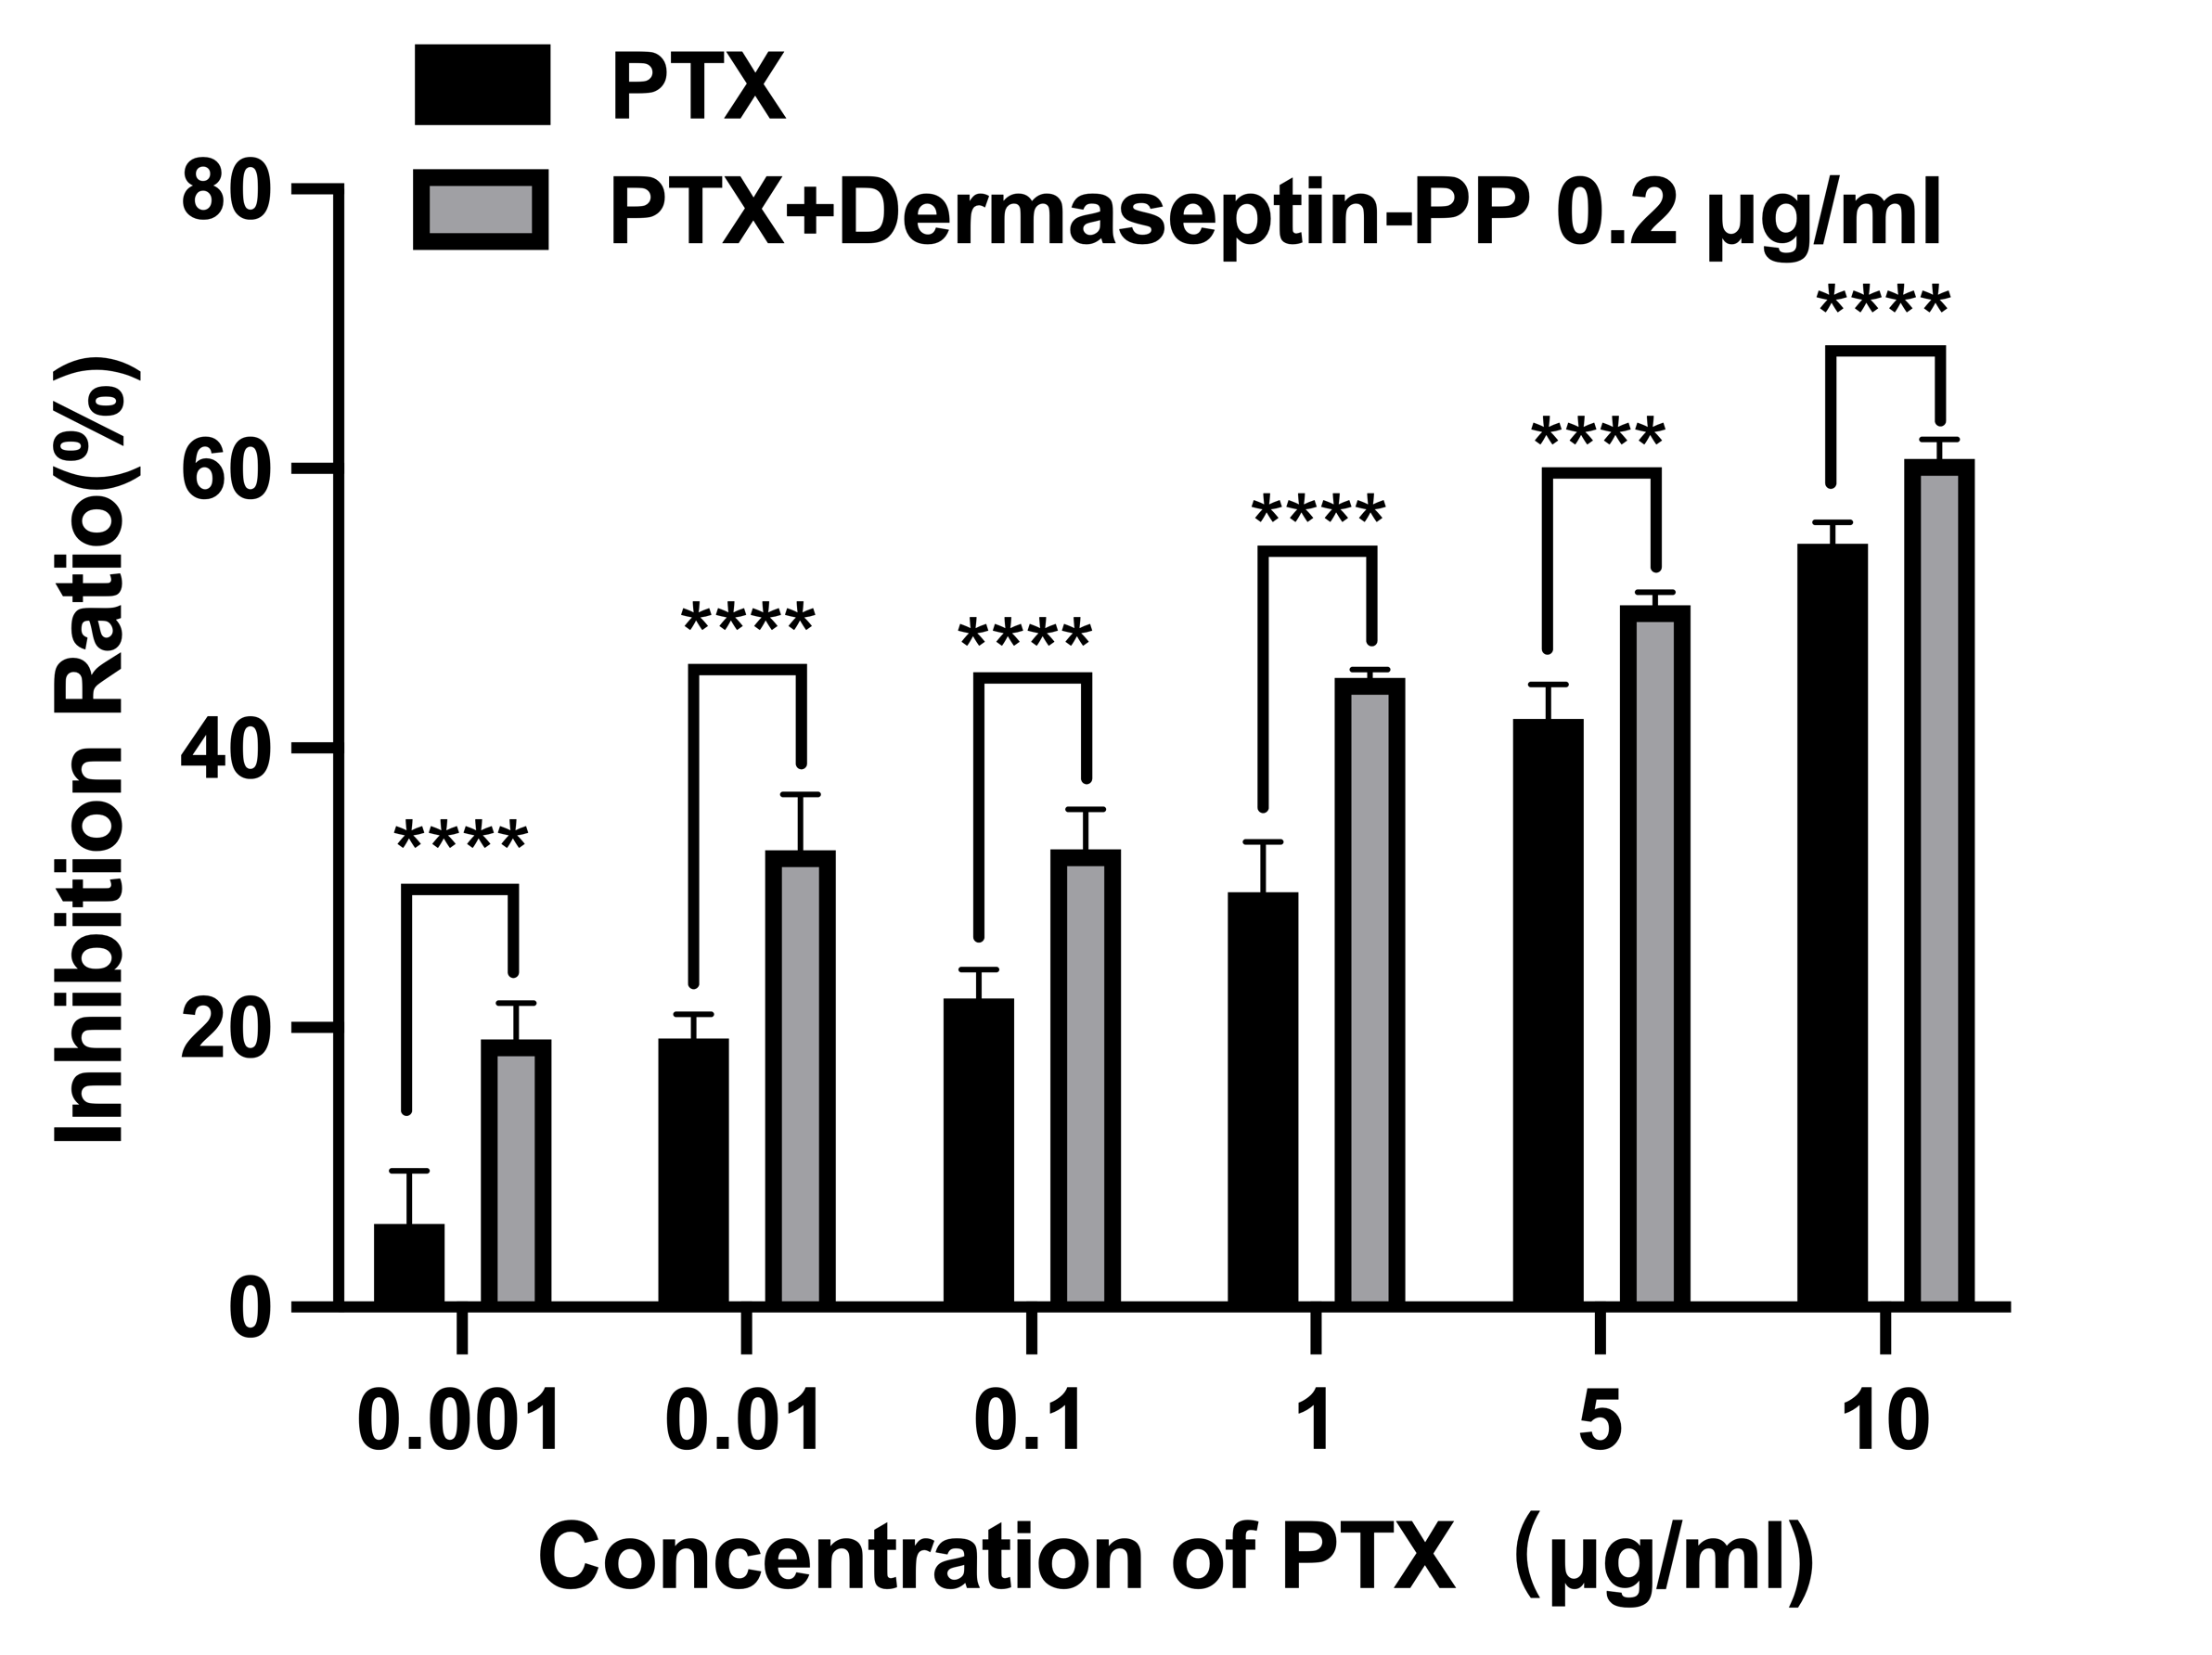


**Figure S2** *In vitro* cytotoxicity assessment of PTX alone with different concentrations or in combination with Dermaseptin-PP (0.2 μg/ml).

Notes: Data were presented as mean ± standard deviation (n = 6; **** P < 0.0001).


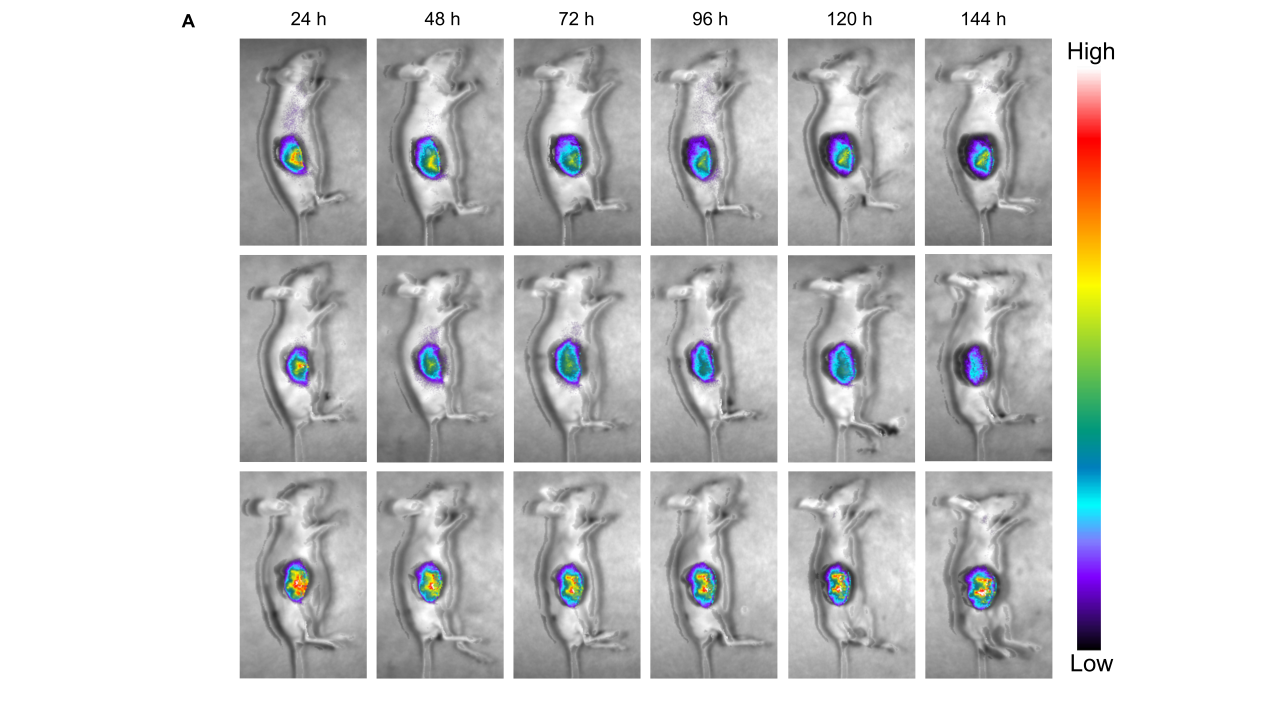


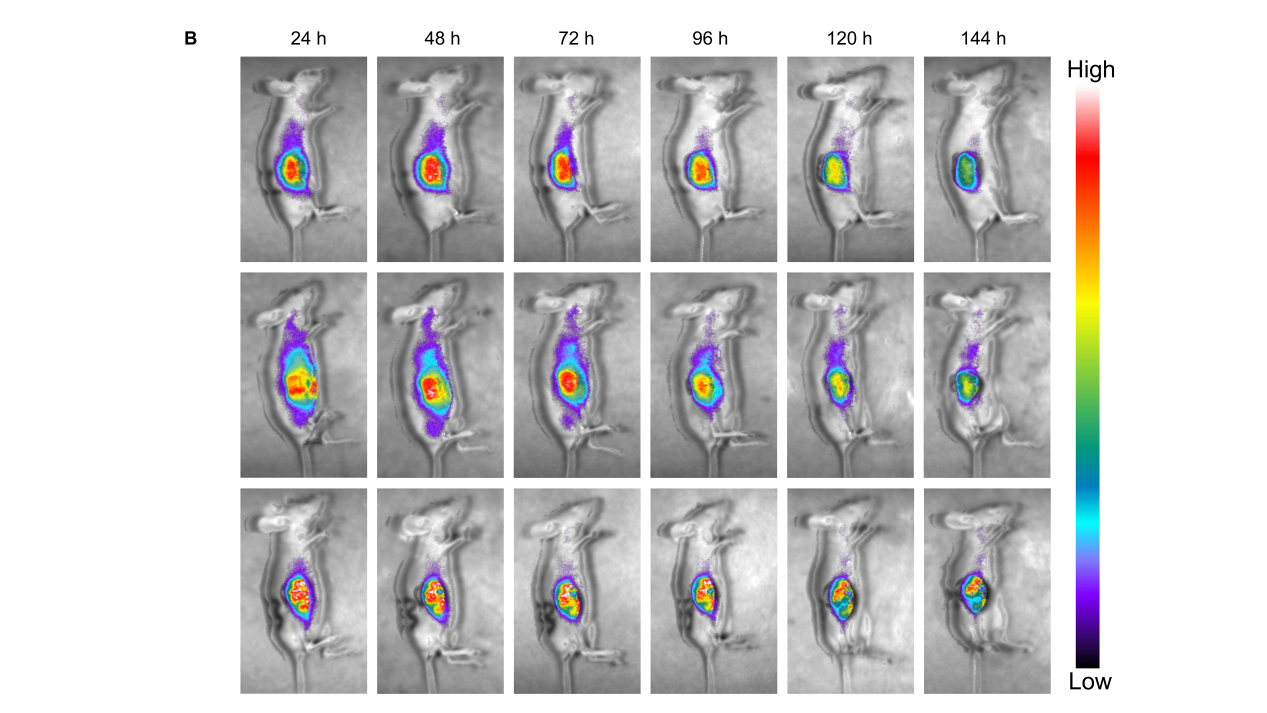


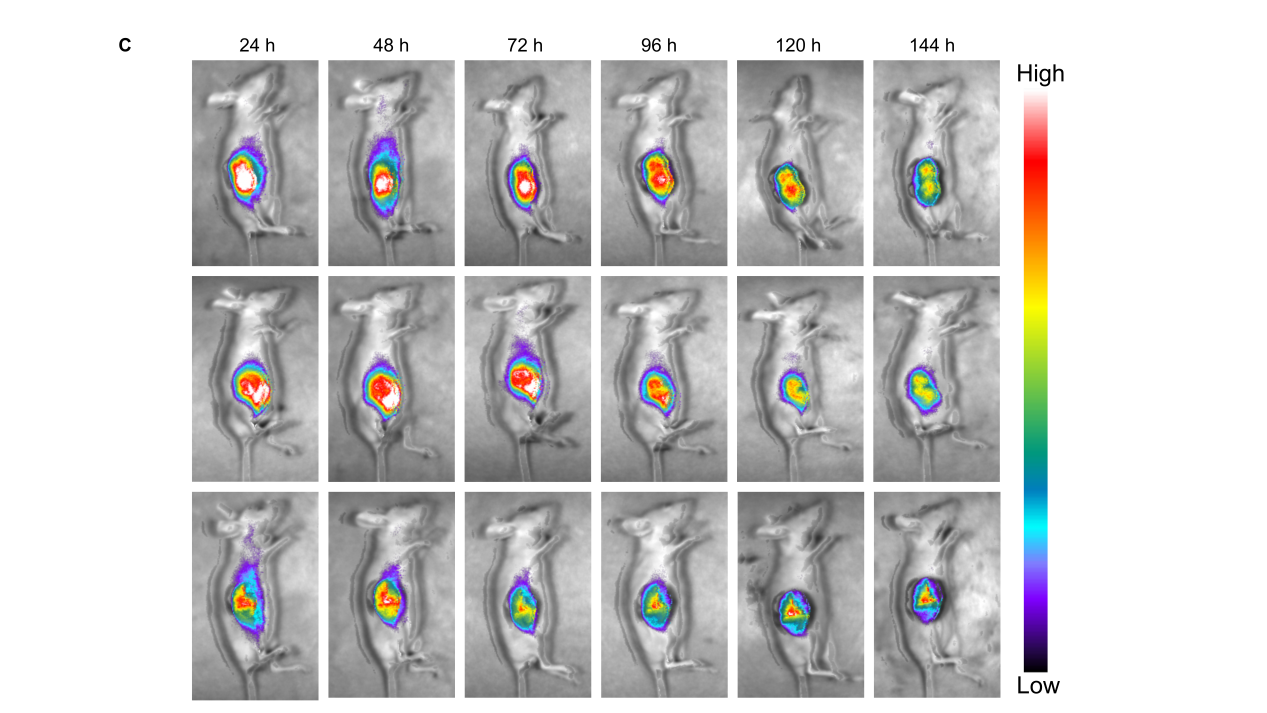


**Figure S3** Residence time of different gels in tumor after intratumoral injection under *in vivo* imaging technology (n=3).

Notes: (**A**) Free IR780 group. (**B**) IRL@gel group. (**C**) Der/IRL@gel group.

**Table S1** Difference between cell inhibition ratio of PTX alone with different concentrations and that of PTX combined with Dermaseptin-PP (0.2 μg/ml).

| **Concentration of PTX (μg/ml)** | **Difference of cell inhibition ratio (%)** |
| --- | --- |
| 0.001 | 13.20 |
| 0.01 | 13.44 |
| 0.1 | 10.72 |
| 1 | 15.32 |
| 5 | 8.17 |
| 10 | 6.02 |

**Table S2** The characterization of PTXL.

|  | **Size (nm)** | **PDI** | **Zeta potential (mV)** |
| --- | --- | --- | --- |
| **1** | 148.70 | 0.21 | -1.17 |
| **2** | 149.20 | 0.20 | -1.29 |
| **3** | 149.00 | 0.21 | -0.58 |
| **Mean** | 148.97 | 0.21 | -1.01 |
| **SD** | 0.21 | 0.01 | 0.31 |
